# Supplementary material for: An Interdisciplinary Investigation of African Rock Art Images to Learn about Science & Culture: Blending Biology, Geology, History & Ethics
Source: Oxford University Press journal article supplement (doi:10.1525/abt.2019.81.1.40), 2018-12-21
Supplement: abt.2019.81.1.40-f1.docx [file abt.2019.81.1.40-f1.docx]

Table S1. Summary of relative dating methods used to examine rock art.

| Bednarik (2012) | |
| --- | --- |
| Weathering rind or zone | Areas where “oxidation, hydration or solution . . . form parallel to rock surfaces” increase in thickness over time |
| Schmidt hammer | “Nondestructive technique for measuring the degree of rock surface weathering” |
| Spalling | Flaking off of materials from boulders or rocks |
| Patination | “A visually obvious surface feature that differs from the unaltered rock in colour or chemical composition” |
| Surface retreat or micro-erosion | “Measurement of the rate of retreat of rapidly eroding surfaces . . . on certain sedimentary rocks” |
| Accretions | Gradual increase or addition to the area |
| Geometry of rock weathering | The use of geometry of stone tool fossils as indicative of geometry of rock weathering |
| Thackeray (1983) | |
| Stylistic change | Though one of the first methods used, this is a much-debated approach (Thackeray, 1983) |
| Superposition | Follows principle of superposition, which states that “in an undeformed sequence of sedimentary rocks, each bed is older than the one above and younger than the one below” (Tarbuck & Lutgens, 2017, p. 351) |
| Visual differences | The “more weathered and deteriorated the rock, the older it must be” |
| Content | Rock art content as indicative of historical period |
| Archaeological associations | How closely related objects, situation, or contexts are/might be |
| Assumptions | “Educated guesses” |
| Amino acids | Methods of “direct dating,” such as counting amino acids, using paper chromatography |
| Radiocarbon dates | Though an example of absolute dating, it is not considered the most reliable by all archaeologists despite improvements in technology |
| Source of African rock art images and background information:   1. The British Museum: http://www.britishmuseum.org/research/collection_online/search.aspx?searchText=dancing+san+rock+art   http://www.britishmuseum.org   1. Trust for African Rock Art: https://africanrockart.org/rock-art-gallery/south-africa/   https://africanrockart.org | |
